# Supplementary material for: A qualitative study on clinicians’ perceptions about the implementation of a population risk stratification tool in primary care practice of the Basque Health Service
Source: BMC Fam Pract. 2014 Sep 8;15:150. doi: 10.1186/1471-2296-15-150 (PMC4165939; doi:10.1186/1471-2296-15-150)
Supplement: Supplementary file 3 — Additional file 3: Nurses’ group node tree [in Spanish]. Node tree resulting from thematic analysis of the Nurses’ group transcribed discussions using NVivo, excel file. (XLSX 12 KB) [file 12875_2013_1123_MOESM3_ESM.xlsx]

## Sheet: Sheet1
Nombre		Recursos	Referencias	Creado el	Creado por	Modificado el	Modificado por
Características adoptantes		0	0	2013-05-13 17:29:01	RS	2013-05-13 17:29:01	RS
sensibilidad poblacional		1	1	2013-05-13 17:32:18	RS	2013-05-14 11:36:46	RS
+		1	16	2013-05-13 19:36:55	RS	2013-05-14 15:14:29	RS
-		1	9	2013-05-13 19:37:02	RS	2013-05-14 18:26:24	RS
conocimiento_información previa		0	0	2013-05-13 17:32:43	RS	2013-05-13 17:32:43	RS
+		1	1	2013-05-14 16:12:58	RS	2013-05-29 20:06:58	RS
visión herramienta ligada a primera aplicación conocida		1	14	2013-05-13 17:53:54	RS	2013-05-29 20:06:58	RS
experiencia en el uso de resultados estratificación		1	2	2013-05-15 10:27:22	RS	2013-07-03 14:20:35	RS
práctica habitual		0	0	2013-05-13 17:32:50	RS	2013-05-13 17:32:50	RS
enfoque poblacional no se da en la practica		1	7	2013-05-13 17:33:05	RS	2013-05-14 18:27:36	RS
actitud favorable al cambio		1	4	2013-05-13 18:04:52	RS	2013-05-30 14:08:28	RS
interés educación sanitaria_enfoque preventivo		1	14	2013-05-14 09:21:30	RS	2013-05-30 14:08:28	RS
formación_capacitación		1	13	2013-05-14 16:05:06	RS	2013-05-29 19:37:59	RS
Características percibidas herramienta		0	0	2013-05-13 17:29:13	RS	2013-05-13 17:29:13	RS
formato		0	0	2013-05-13 17:55:51	RS	2013-05-14 16:17:40	RS
mayor agilidad en localización pacientes		1	2	2013-05-14 10:16:21	RS	2013-05-29 20:28:55	RS
autonomía explotación_gestión de la información		1	4	2013-05-13 18:01:29	RS	2013-05-14 16:17:40	RS
producto		0	0	2013-05-13 18:01:44	RS	2013-05-14 18:35:15	RS
los de fuera del radar		1	1	2013-05-13 18:02:12	RS	2013-05-29 19:56:48	RS
fiabilidad dudosa		0	0	2013-05-15 17:20:47	RS	2013-05-15 17:20:47	RS
fallo codificación de base		1	2	2013-05-13 17:55:02	RS	2013-05-14 16:02:24	RS
errores listados		1	4	2013-05-14 10:21:14	RS	2013-05-29 20:02:24	RS
origen EEUU		1	2	2013-05-14 12:13:08	RS	2013-05-29 20:03:18	RS
falta información sobre variables		0	0	2013-05-29 20:01:56	RS	2013-05-29 20:02:24	RS
social		1	9	2013-05-14 12:19:48	RS	2013-05-29 20:03:31	RS
efectividad no probada o limitada como herramienta intervención		1	8	2013-05-13 18:14:27	RS	2013-05-29 20:02:24	RS
requiere continuidad en el tiempo		1	1	2013-05-29 20:01:22	RS	2013-05-29 20:02:55	RS
Estrategia de implementación		0	0	2013-05-13 17:29:23	RS	2013-05-13 17:29:23	RS
falta implicación usuarios potenciales_estrategia de introducción al revés		1	6	2013-05-13 17:37:18	RS	2013-05-29 20:07:54	RS
falta información objetivos y herramienta		1	16	2013-05-13 17:37:35	RS	2013-05-14 18:12:35	RS
aparición icono sin previo aviso		1	2	2013-05-13 17:54:46	RS	2013-05-14 10:15:34	RS
Desconfianza emisor		1	2	2013-05-13 17:37:45	RS	2013-05-29 19:48:07	RS
introduce innovaciones no testadas		1	2	2013-05-13 17:37:59	RS	2013-05-14 12:11:04	RS
distancia con los impulsores		1	5	2013-05-14 17:46:17	RS	2013-05-29 20:13:52	RS
obvia variabilidad inter-centros		1	12	2013-05-13 18:07:13	RS	2013-05-29 20:16:58	RS
faltan directrices_rumbo		1	5	2013-05-14 11:55:31	RS	2013-05-14 18:48:13	RS
desconfianza objetivos estratificación		0	0	2013-05-29 19:45:31	RS	2013-05-29 20:15:42	RS
gestores interesados en datos, no en resultados en salud		1	19	2013-05-13 17:34:15	RS	2013-05-29 20:09:21	RS
falta concreción finalidad		1	7	2013-05-14 18:01:17	RS	2013-05-14 18:48:18	RS
prima interés económico y clave hospitalaria		1	4	2013-05-14 12:45:32	RS	2013-05-29 20:14:08	RS
Características contexto		0	0	2013-05-13 17:29:36	RS	2013-05-13 17:29:36	RS
facilitadores		0	0	2013-05-13 17:34:41	RS	2013-05-29 19:47:56	RS
necesidad reorganización trabajo		0	0	2013-05-16 12:54:26	RS	2013-06-06 15:16:58	RS
necesidad cambio en priorizacion poblacional		1	14	2013-05-13 17:36:47	RS	2013-05-29 19:53:00	RS
necesidad tiempo		1	5	2013-05-14 11:30:26	RS	2013-05-29 19:53:11	RS
necesidad roles		1	1	2013-05-13 17:36:02	RS	2013-05-14 16:24:26	RS
necesidad de recursos y herramientas intervencion		1	11	2013-05-14 09:26:10	RS	2013-06-06 15:16:58	RS
barreras		0	0	2013-05-13 18:08:22	RS	2013-05-29 19:47:56	RS
saturacion demanda_asistencial		1	14	2013-05-13 17:33:20	RS	2013-05-16 12:55:58	RS
población dependiente sistema		1	11	2013-05-14 15:10:35	RS	2013-05-30 14:08:20	RS
saturación proyectos y cambios		1	10	2013-05-13 17:33:38	RS	2013-05-16 12:55:58	RS
dificultad de acceso e intervención en poblaciones diana		1	21	2013-05-13 19:33:04	RS	2013-05-16 12:55:58	RS
falta información especializada		1	2	2013-05-14 15:22:16	RS	2013-05-16 12:56:14	RS
resistencia al cambio de los profesionales		1	4	2013-05-13 18:05:47	RS	2013-05-16 12:55:58	RS
Utilidades		0	0	2013-05-13 18:03:00	RS	2013-05-29 19:48:07	RS
herramienta informativa		1	2	2013-05-13 18:03:42	RS	2013-05-14 10:34:01	RS
identificar poblaciones fuera del radar de los profesionales		1	4	2013-05-13 18:15:01	RS	2013-05-29 20:22:23	RS
poblaciones diana		1	7	2013-05-13 18:03:36	RS	2013-05-14 14:12:02	RS
herramienta intervención		1	3	2013-05-13 18:03:50	RS	2013-05-14 16:33:01	RS
en consulta individual		1	9	2013-05-13 18:03:59	RS	2013-05-14 16:32:30	RS
grupal		1	4	2013-05-13 18:04:05	RS	2013-05-29 20:12:14	RS
comunitaria		1	5	2013-05-13 18:04:11	RS	2013-05-14 16:16:38	RS
preventiva (educación, cambio hábitos)		1	7	2013-05-14 13:40:20	RS	2013-05-14 18:17:02	RS
ninguna		1	2	2013-05-14 10:31:26	RS	2013-05-14 16:26:51	RS
